# Supplementary material
Source: PubMed Central journal article supplement (PMC3216052)
Supplement: NIHMS325924-supplement-1_si_001.pdf [file NIHMS325924-supplement-1_si_001.pdf]

Molecular Self Assembly: Solvent Guests Tune the  
Conformation of a Series of 2,6-Bis(2-  
anilinoethynyl)pyridine-Based Ureas

*Jeffrey M. Engle, P. S. Lakshminarayanan, Calden N. Carroll, Lev N. Zakharov,\**

*Michael M. Haley\* and Darren W. Johnson\**

Department of Chemistry and Materials Science Institute,

University of Oregon,

Eugene, Oregon 97403-1253 (USA)

**Table S1.** Crystallographic Data and Data Collections and Refinements Parameters for the investigated structures:

|                                 | <b>L<sup>1</sup>•2DMSO</b>                                                                          | <b>L<sup>1</sup>•2DMSO•CH<sub>3</sub>OH</b>                                                                     | <b>L<sup>1</sup>•3DMF</b>                                                                                      |
|---------------------------------|-----------------------------------------------------------------------------------------------------|-----------------------------------------------------------------------------------------------------------------|----------------------------------------------------------------------------------------------------------------|
| Empirical formula               | C <sub>47</sub> H <sub>51</sub> N <sub>7</sub> O <sub>8</sub> S <sub>2</sub>                        | C <sub>48</sub> H <sub>55</sub> N <sub>7</sub> O <sub>9</sub> S <sub>2</sub>                                    | C <sub>52</sub> H <sub>60</sub> N <sub>10</sub> O <sub>9</sub>                                                 |
| Formula weight                  | 906.07                                                                                              | 938.11                                                                                                          | 969.10                                                                                                         |
| Temperature                     | 173(2) K                                                                                            | 173(2) K                                                                                                        | 173(2) K                                                                                                       |
| Wavelength                      | 0.71073 Å                                                                                           | 0.71073 Å                                                                                                       | 0.71073 Å                                                                                                      |
| Crystal system                  | Monoclinic                                                                                          | Triclinic                                                                                                       | Triclinic                                                                                                      |
| Space group                     | <i>P2<sub>1</sub>/c</i>                                                                             | <i>P</i> -1                                                                                                     | <i>P</i> -1                                                                                                    |
| Unit cell dimensions            | a = 14.7007(13) Å<br>b = 25.956(2) Å<br>c = 12.3794(11) Å<br>α = 90°<br>β = 103.568(1)°<br>γ = 90°. | a = 13.037(8) Å<br>b = 14.106(9) Å<br>c = 14.707(9) Å<br>α = 112.755(10)<br>β = 103.142(10)°<br>γ = 92.983(11)° | a = 9.6860(14) Å<br>b = 12.7435(18) Å<br>c = 20.683(3) Å<br>α = 93.436(3)°<br>β = 98.492(3)°<br>γ = 95.516(3)° |
| Volume                          | 4591.8(7) Å <sup>3</sup>                                                                            | 2399(3) Å <sup>3</sup>                                                                                          | 2506.1(6) Å <sup>3</sup>                                                                                       |
| Z                               | 4                                                                                                   | 2                                                                                                               | 2                                                                                                              |
| Density (calculated)            | 1.311 Mg/m <sup>3</sup>                                                                             | 1.299 Mg/m <sup>3</sup>                                                                                         | 1.284 Mg/m <sup>3</sup>                                                                                        |
| Absorption coefficient          | 0.177 mm <sup>-1</sup>                                                                              | 0.173 mm <sup>-1</sup>                                                                                          | 0.090 mm <sup>-1</sup>                                                                                         |
| F(000)                          | 1912                                                                                                | 992                                                                                                             | 1028                                                                                                           |
| Crystal size                    | 0.33 x 0.23 x 0.12 mm <sup>3</sup>                                                                  | 0.38 x 0.22 x 0.05 mm <sup>3</sup>                                                                              | 0.19 x 0.04 x 0.02 mm <sup>3</sup>                                                                             |
| Theta range for data collection | 1.57 to 25.00°                                                                                      | 1.58 to 24.00°.                                                                                                 | 1.00 to 25.00°.                                                                                                |
| Index ranges                    | -17<=h<=17, -30<=k<=30, -14<=l<=14                                                                  | -14<=h<=14, -16<=k<=16, -16<=l<=16                                                                              | -11<=h<=11, -15<=k<=15, -24<=l<=24                                                                             |

|                                   |                                             |                                             |                                             |
|-----------------------------------|---------------------------------------------|---------------------------------------------|---------------------------------------------|
| Reflections collected             | 44074                                       | 20819                                       | 24347                                       |
| Independent reflections           | 8098 [R(int) = 0.0233]                      | 7533 [R(int) = 0.0580]                      | 8816 [R(int) = 0.0638]                      |
| Completeness to theta = 25.00°    | 100.0 %                                     | 99.9 %                                      | 99.8 %                                      |
| Absorption correction             | Semi-empirical<br>equivalents               | from<br>Semi-empirical<br>equivalents       | from<br>Semi-empirical<br>equivalents       |
| Max. and min. transmission        | 0.9791 and 0.9439                           | 0.9914 and 0.9370                           | 0.9982 and 0.9832                           |
| Refinement method                 | Full-matrix least-squares on F <sup>2</sup> | Full-matrix least-squares on F <sup>2</sup> | Full-matrix least-squares on F <sup>2</sup> |
| Data / restraints / parameters    | 8098 / 0 / 593                              | 7533 / 6 / 666                              | 8816 / 6 / 654                              |
| Goodness-of-fit on F <sup>2</sup> | 1.014                                       | 1.032                                       | 1.005                                       |
| Final R indices [I > 2sigma(I)]   | R1 = 0.0473, wR2 = 0.1226                   | R1 = 0.0867, wR2 = 0.2233                   | R1 = 0.0698, wR2 = 0.1632                   |
| R indices (all data)              | R1 = 0.0538, wR2 = 0.1290                   | R1 = 0.1382, wR2 = 0.2502                   | R1 = 0.1309, wR2 = 0.2028                   |
| Largest diff. peak and hole       | 0.748 and -0.613 e.Å <sup>-3</sup>          | 0.609 and -0.759 e.Å <sup>-3</sup>          | 0.499 and -0.270 e.Å <sup>-3</sup>          |

|                                 | <b>L<sup>2</sup>•H<sub>2</sub>O •0.5DMSO</b>                                                                                             | <b>L<sup>3</sup>•H<sub>2</sub>O•DMSO (I)</b>                                                                                                              | <b>L<sup>3</sup>•H<sub>2</sub>O•DMSO (II)</b>                                                                                                       |
|---------------------------------|------------------------------------------------------------------------------------------------------------------------------------------|-----------------------------------------------------------------------------------------------------------------------------------------------------------|-----------------------------------------------------------------------------------------------------------------------------------------------------|
| Empirical formula               | C <sub>38</sub> H <sub>26</sub> F <sub>6</sub> N <sub>7</sub> O <sub>7.50</sub> S <sub>0.50</sub>                                        | C <sub>41</sub> H <sub>35</sub> F <sub>6</sub> N <sub>5</sub> O <sub>6</sub> S                                                                            | C <sub>41</sub> H <sub>35</sub> F <sub>6</sub> N <sub>5</sub> O <sub>6</sub> S                                                                      |
| Formula weight                  | 830.69                                                                                                                                   | 839.80                                                                                                                                                    | 839.80                                                                                                                                              |
| Temperature                     | 173(2) K                                                                                                                                 | 173(2) K                                                                                                                                                  | 173(2) K                                                                                                                                            |
| Wavelength                      | 0.71073 Å                                                                                                                                | 0.71073 Å                                                                                                                                                 | 0.71073 Å                                                                                                                                           |
| Crystal system                  | Monoclinic                                                                                                                               | Triclinic                                                                                                                                                 | Triclinic                                                                                                                                           |
| Space group                     | <i>P2/n</i>                                                                                                                              | <i>P</i> -1                                                                                                                                               | <i>P</i> -1                                                                                                                                         |
| Unit cell dimensions            | <i>a</i> = 14.8341(13) Å<br><i>b</i> = 9.5759(9) Å<br><i>c</i> = 29.903(3) Å<br>$\alpha$ = 90°<br>$\beta$ = 90.690(2)°<br>$\gamma$ = 90° | <i>a</i> = 8.7292(10) Å<br><i>b</i> = 13.3810(15) Å<br><i>c</i> = 17.3731(19) Å<br>$\alpha$ = 84.395(2)°<br>$\beta$ = 78.492(2)°<br>$\gamma$ = 80.087(2)° | <i>a</i> = 9.533(2) Å<br><i>b</i> = 14.185(3) Å<br><i>c</i> = 16.112(4) Å<br>$\alpha$ = 73.871(4)°<br>$\beta$ = 78.002(4)°<br>$\gamma$ = 71.375(4)° |
| Volume                          | 4247.3(7) Å <sup>3</sup>                                                                                                                 | 1954.6(4) Å <sup>3</sup>                                                                                                                                  | 1966.3(7) Å <sup>3</sup>                                                                                                                            |
| Z                               | 4                                                                                                                                        | 2                                                                                                                                                         | 2                                                                                                                                                   |
| Density (calculated)            | 1.299 Mg/m <sup>3</sup>                                                                                                                  | 1.427 Mg/m <sup>3</sup>                                                                                                                                   | 1.418 Mg/m <sup>3</sup>                                                                                                                             |
| Absorption coefficient          | 0.133 mm <sup>-1</sup>                                                                                                                   | 0.167 mm <sup>-1</sup>                                                                                                                                    | 0.166 mm <sup>-1</sup>                                                                                                                              |
| F(000)                          | 1700                                                                                                                                     | 868                                                                                                                                                       | 868                                                                                                                                                 |
| Crystal size                    | 0.43 x 0.12 x 0.03 mm <sup>3</sup>                                                                                                       | 0.33 x 0.12 x 0.03 mm <sup>3</sup>                                                                                                                        | 0.45 x 0.06 x 0.04 mm <sup>3</sup>                                                                                                                  |
| Theta range for data collection | 1.36 to 25.00°.                                                                                                                          | 1.20 to 25.00°.                                                                                                                                           | 1.56 to 25.00°                                                                                                                                      |
| Index ranges                    | -17<= <i>h</i> <=17, -11<= <i>k</i> <=11, -<br>35<= <i>l</i> <=35                                                                        | 10<= <i>h</i> <=10, -<br>15<= <i>k</i> <=15, -20<= <i>l</i> <=20                                                                                          | - 11<= <i>h</i> <=11, -16<= <i>k</i> <=16, -<br>19<= <i>l</i> <=19                                                                                  |
| Reflections collected           | 39732                                                                                                                                    | 19048                                                                                                                                                     | 18895                                                                                                                                               |
| Independent reflections         | 7464 [R(int) = 0.0439]                                                                                                                   | 6884 [R(int) = 0.0204]                                                                                                                                    | 6893 [R(int) = 0.0428]                                                                                                                              |

|                                   |                                             |                                             |                                             |
|-----------------------------------|---------------------------------------------|---------------------------------------------|---------------------------------------------|
| Completeness to theta = 25.00°    | 99.7 %                                      | 99.8 %                                      | 99.7 %                                      |
| Absorption correction             | Semi-empirical from equivalents             | Semi-empirical from equivalents             | Semi-empirical from equivalents             |
| Max. and min. transmission        | 0.9935 and 0.9128                           | 0.9950 and 0.9471                           | 0.9934 and 0.9292                           |
| Refinement method                 | Full-matrix least-squares on F <sup>2</sup> | Full-matrix least-squares on F <sup>2</sup> | Full-matrix least-squares on F <sup>2</sup> |
| Data / restraints / parameters    | 7464 / 0 / 561                              | 6884 / 0 / 648                              | 6893 / 0 / 556                              |
| Goodness-of-fit on F <sup>2</sup> | 1.049                                       | 1.002                                       | 1.024                                       |
| Final R indices [I>2sigma(I)]     | R1 = 0.0722, wR2 = 0.1943                   | R1 = 0.0569, wR2 = 0.1643                   | R1 = 0.0671, wR2 = 0.1623                   |
| R indices (all data)              | R1 = 0.0963, wR2 = 0.2080                   | R1 = 0.0711, wR2 = 0.1820                   | R1 = 0.1144, wR2 = 0.1919                   |
| Largest diff. peak and hole       | 0.574 and -0.342 e.Å <sup>-3</sup>          | 0.882 and -0.518 e.Å <sup>-3</sup>          | 0.818 and -0.361 e.Å <sup>-3</sup>          |

**Table S2.** Hydrogen bonding interactions in **L<sup>1</sup>•2DMSO** [Å and °].

| D-H...A           | d(D-H)  | d(H...A) | d(D...A) | <(DHA) |
|-------------------|---------|----------|----------|--------|
| N(5)-H(5N)...O(8) | 0.81(3) | 2.20(3)  | 2.935(3) | 151(2) |
| N(6)-H(6N)...O(8) | 0.85(3) | 1.99(3)  | 2.790(3) | 156(2) |
| N(3)-H(3N)...O(7) | 0.83(3) | 1.93(3)  | 2.757(2) | 169(2) |
| N(2)-H(2N)...O(7) | 0.80(3) | 2.42(3)  | 3.122(2) | 148(2) |

---

**Table S3.** Hydrogen bonding interactions in  $L^1 \cdot 2DMSO \cdot CH_3OH$  [ $\text{\AA}$  and  $^\circ$ ].

| D-H...A            | d(D-H)  | d(H...A) | d(D...A) | <(DHA) |
|--------------------|---------|----------|----------|--------|
| N(2)-H(2N)...O(1S) | 1.01(6) | 2.41(6)  | 3.202(5) | 135(4) |
| N(6)-H(6N)...O(2S) | 1.06(5) | 1.71(5)  | 2.767(6) | 172(4) |
| O(1S)-H(1S)...N(1) | 1.07(7) | 1.69(7)  | 2.731(5) | 163(6) |
| N(5)-H(5N)...O(2S) | 1.15(6) | 2.25(6)  | 3.229(6) | 141(4) |
| N(3)-H(3N)...O(1S) | 0.95(5) | 1.84(5)  | 2.786(5) | 174(4) |

**Table S4.** Hydrogen bonding interactions of  $L^1 \cdot 3DMF$  [ $\text{\AA}$  and  $^\circ$ ].

| D-H...A              | d(D-H)  | d(H...A) | d(D...A) | <(DHA) |
|----------------------|---------|----------|----------|--------|
| N(2)-H(2N)...O(1S)#1 | 0.86(4) | 2.35(4)  | 3.137(4) | 151(3) |
| N(3)-H(3N)...O(1S)#1 | 0.88(4) | 2.02(4)  | 2.851(4) | 159(4) |
| N(5)-H(5N)...O(2S)   | 0.84(3) | 2.36(4)  | 3.052(4) | 140(3) |
| N(6)-H(6N)...O(2S)   | 0.91(4) | 1.93(4)  | 2.825(4) | 168(3) |

Symmetry transformations used to generate equivalent atoms: #1 x+1, y, z

**Table S5.** Hydrogen bonding interactions in  $L^2 \cdot H_2O \cdot 0.5DMSO$  [ $\text{\AA}$  and  $^\circ$ ].

| D-H...A | d(D-H ) | d(H...A) | d(D...A) | <(DHA) |
|---------|---------|----------|----------|--------|
|---------|---------|----------|----------|--------|

---

|                      |          |          |          |        |
|----------------------|----------|----------|----------|--------|
| N(2)-H(2N)···O(1S)   | 0.91(4)  | 2.49(4)  | 3.229(4) | 138(3) |
| N(3)-H(3N)···O(1S)   | 0.89(4)  | 1.92(4)  | 2.795(4) | 167(3) |
| O(1S)-H(1S)···N(1)   | 0.75(5)  | 2.12(5)  | 2.867(4) | 174(5) |
| O(1S)-H(2S)···O(4)#2 | 0.90(10) | 1.92(10) | 2.821(4) | 177(9) |

Symmetry transformations used to generate equivalent atoms:

#1 -x+1/2,y,-z+1/2 #2 -x+1,-y+1,-z

**Table S6.** Hydrogen bonding interactions of  $L^3 \cdot H_2O \cdot DMSO$  (I) [ $\text{\AA}$  and  $^\circ$ ]

| D-H···A              | d(D-H)  | d(H···A) | d(D···A) | <(DHA) |
|----------------------|---------|----------|----------|--------|
| N(5)-H(5N)···S(1S)#1 | 0.86(4) | 2.92(4)  | 3.660(3) | 145(3) |
| N(5)-H(5N)···O(1S)#1 | 0.86(4) | 1.95(4)  | 2.783(3) | 163(3) |
| O(5)-H(5B)···O(3)#1  | 0.71(5) | 2.10(5)  | 2.804(3) | 169(5) |
| O(5)-H(5A)···N(1)    | 0.77(4) | 2.09(4)  | 2.809(3) | 157(3) |
| N(3)-H(3N)···O(5)    | 0.89(3) | 1.93(3)  | 2.799(3) | 165(3) |
| N(4)-H(4N)···O(1S)#1 | 0.81(3) | 2.33(3)  | 3.030(3) | 147(2) |
| N(2)-H(2N)···O(5)    | 0.84(3) | 2.28(3)  | 3.030(3) | 148(3) |

Symmetry transformations used to generate equivalent atoms:

#1 -x+1,-y+2,-z+1

**Table S7.** Hydrogen bonding interactions in  $L^3 \cdot H_2O \cdot DMSO$  (II) [ $\text{\AA}$ ,  $^\circ$ ]

| D-H···A           | d(D-H)  | d(H···A) | d(D···A) | <(DHA) |
|-------------------|---------|----------|----------|--------|
| N(2)-H(2N)···O(5) | 0.76(3) | 2.35(4)  | 3.039(5) | 150(3) |
| N(3)-H(3N)···O(5) | 0.81(3) | 2.04(4)  | 2.828(5) | 165(3) |

|                      |         |         |          |        |
|----------------------|---------|---------|----------|--------|
| N(4)-H(4N)···O(1S)#1 | 0.74(4) | 2.32(4) | 2.950(4) | 145(4) |
| N(5)-H(5N)···O(1S)#1 | 0.80(4) | 2.02(4) | 2.795(5) | 163(4) |
| O(5)-H(5A)···N(1)    | 0.84(5) | 2.04(5) | 2.871(5) | 172(5) |
| O(5)-H(5B)···O(3)#2  | 0.73(5) | 2.07(6) | 2.774(5) | 163(6) |

Symmetry transformations used to generate equivalent atoms:

#1 -x+1,-y+1,-z+1 #2 -x+1,-y,-z+1



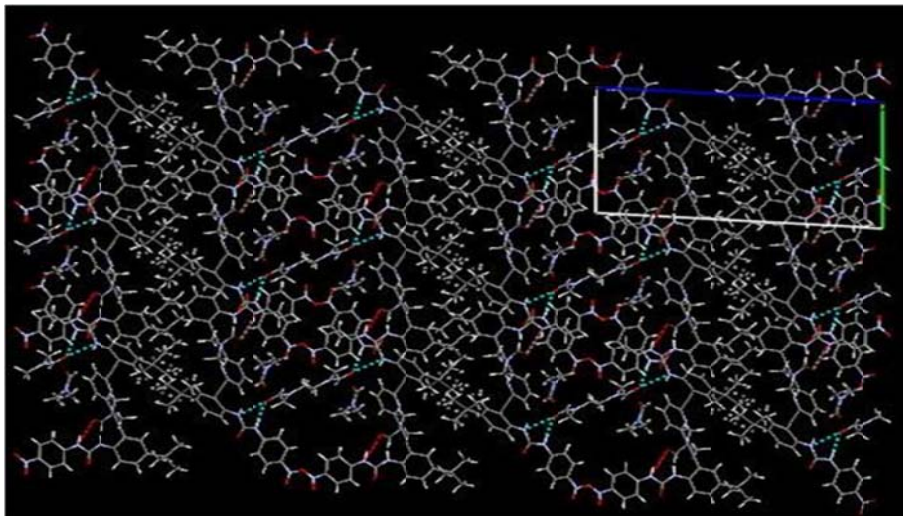

**Figure S1.** General packing diagram of  $L^1 \cdot 3DMF$  viewed down the crystallographic  $a$ -axis showing the various hydrogen-bonding interactions.

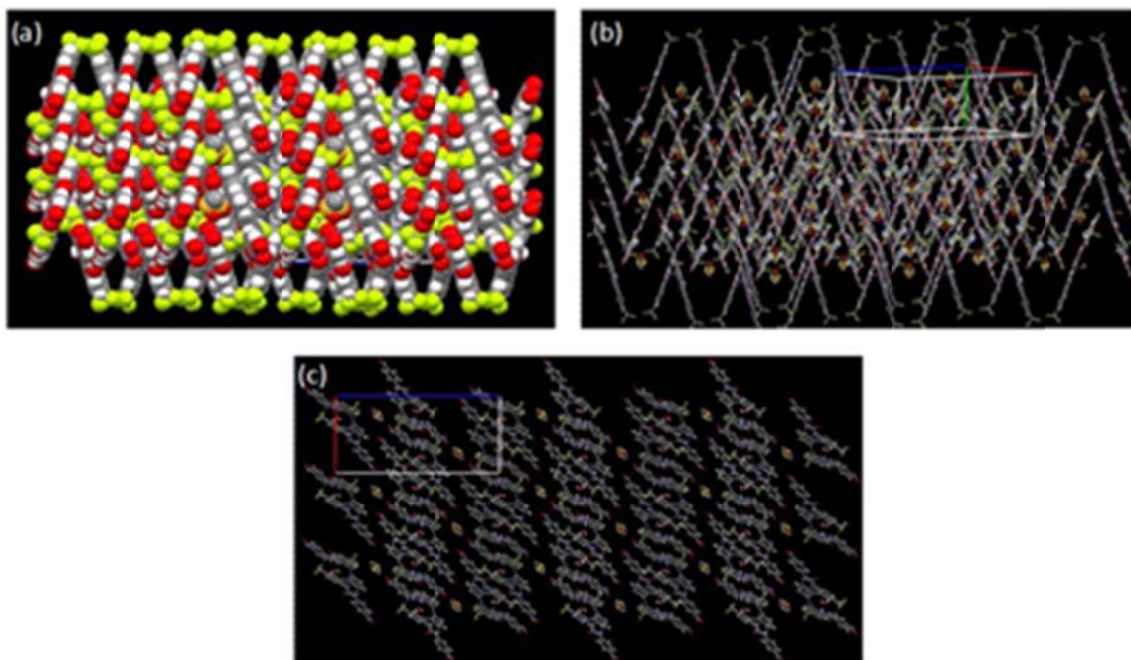

**Figure S2.** (a) Packing model of  $L^2 \cdot H_2O \cdot 0.5DMSO$  along the pseudo  $c$ -axis as a space-filling model (solvent water and DMSO molecules are omitted for clarity). (b) Packing model of  $L^2 \cdot H_2O \cdot 0.5DMSO$  and solvents along the pseudo  $c$ -axis and (c)  $b$ -axis.
